1 **Integrated Structure-Transcription analysis of small molecules reveals**  
2 **widespread noise in drug-induced transcriptional responses and a**  
3 **transcriptional signature for drug-induced phospholipidosis.**

4 Francesco Sirci<sup>1</sup>, Francesco Napolitano<sup>1,+</sup>, Sandra Pisonero-Vaquero<sup>1,+</sup>, Diego Carrella<sup>1</sup>, Diego L.  
5 Medina\* and Diego di Bernardo<sup>\*1,2</sup>

6  
7 1 Telethon Institute of Genetics and Medicine (TIGEM), Via Campi Flegrei 34, 80078 Pozzuoli  
8 (NA), Italy

9 2 Department of Chemical, Materials and Industrial Production Engineering, University of Naples  
10 Federico II, Piazzale Tecchio 80, 80125 Naples, Italy

11 + These authors contributed equally to this work.

12 \*co-corresponding authors

13

14 **Abstract**

15 We performed an integrated analysis of drug chemical structures and drug-induced transcriptional  
16 responses. We demonstrated that a network representing 3D structural similarities among 5,452  
17 compounds can be used to automatically group together drugs with similar scaffolds and mode-of-  
18 action. We then compared the structural network to a network representing transcriptional  
19 similarities among a subset of 1,309 drugs for which transcriptional response were available in the  
20 Connectivity Map dataset. Analysis of structurally similar, but transcriptionally different, drugs  
21 sharing the same mode of action (MOA) enabled us to detect and remove weak and noisy  
22 transcriptional responses, greatly enhancing the reliability and usefulness of transcription-based  
23 approaches to drug discovery and drug repositioning. Analysis of transcriptionally similar, but  
24 structurally different drugs with unrelated MOA, led us to the identification of a “toxic”  
25 transcriptional signature indicative of lysosomal stress (lysosomotropism) and lipid accumulation  
26 (phospholipidosis) partially masking the target-specific transcriptional effects of these drugs. We  
27 further demonstrated by High Content Screening that this transcriptional signature is caused by the  
28 activation of the transcription factor TFEB, a master regulator of lysosomal biogenesis and  
29 autophagy. Our results show that chemical structures and transcriptional profiles provide  
30 complementary information and that combined analysis can lead to new insights on on- and off-  
31 target effects of small molecules.

32

33 **Introduction**

34 Chemo-informatics approaches to rational drug design have traditionally assumed that  
35 chemically similar molecules have similar activities. More recently, transcriptional responses of  
36 cells treated with small molecules have been used in the lead optimization phase of drug discovery  
37 projects<sup>1</sup> and to reveal similarities among drugs, and quickly transfer indications for drug  
38 repositioning.<sup>2-6</sup>

39 The Connectivity Map (CMAP), the largest peer-reviewed public database of gene  
40 expression profiles following treatment of five human cancer cell lines with 1,309 different bioactive  
41 small molecules<sup>2,7</sup>, has been extensively used by both the academic and industrial communities.<sup>3,8</sup>

42 Whereas computational medicinal chemistry's "pros" and "cons" have been extensively  
43 addressed over the recent years,<sup>9-17</sup> on the contrary, the advantages and limits of methods based  
44 on transcriptional responses have not been thoroughly addressed.<sup>1,3</sup> So far, comparisons of the  
45 chemical versus transcriptional "landscape" of small molecules has been performed to elucidate  
46 and understanding mode of actions of existing drugs and revealing potential on-label and off-label  
47 applications.<sup>18-21</sup> In this work, on the contrary, we addressed two still unanswered questions: (1) do  
48 transcriptional responses and chemical structures provide similar information on the drug  
49 mechanism of action and adverse effects? (2) If not, why does the information provided by  
50 transcriptional responses and chemical structures differ?

51 In this work, we compared chemical structures to transcriptional responses in the CMAP  
52 dataset by first generating a "structural" drug network by connecting pairs of structurally similar  
53 drugs, as measured by 3D pharmacophore descriptors based on Molecular Interaction Fields.<sup>22,23</sup>  
54 We then compared the structural drug network to a transcriptional drug network where drugs are  
55 connected if they induce a similar transcriptional profile.<sup>4,24,25</sup>

56 Through the integrated analysis of chemical structures and transcriptional responses of  
57 small molecules, we revealed limitations and pitfalls of both transcriptional and structural  
58 approaches, and proposed ways to overcome them. Moreover, we found an unexpected link  
59 between drug-induced lysosomotropism and lipid accumulation, common adverse effects, and a  
60 specific transcriptional signature mediated by the transcription factor TFEB.

61

## 62 **Results**

63 The CMAP dataset is a collection of transcriptional responses of human cell lines to small  
64 molecules. It includes transcriptional profiles following treatment of 1,309 small molecules across  
65 five different cell lines, selected to represent a broad range of activities, including both FDA-  
66 approved drugs (670 out of 1309 (51%)) and non-drug bioactive “tool” compounds.<sup>2</sup> An extension  
67 of this dataset to more than 5000 small molecules is being completed but it includes only 1,000  
68 genes and it has not been peer-reviewed yet (LINCS <http://www.lincscloud.org>).<sup>2,7</sup> We selected the  
69 small molecules present in the CMAP and in the upcoming LINCS resource for a total of 5,452  
70 compounds (**Supplementary Fig. 1**). We then performed a physico-chemical characterization of  
71 these 5,452 small molecules by computing 128 physico-chemical descriptors using 3D Molecular  
72 Interaction Fields (MIFs) derived from their chemical structures.<sup>26, 27</sup>

73 Principal Component Analysis (PCA) of the 128 descriptors for all the 5,452 compounds in  
74 **Supplementary Figure 2a** reveals that the first two principal components (PC1 and PC2) explain  
75 most of the descriptors’ variance (53%). PC1 (36%) is related to descriptors of hydrophobic and  
76 aromatic properties (**Supplementary Fig. 2b**), whereas PC2 (17%) to molecular size and shape.  
77 Most of these small molecules follow the ‘Rule of Fives (RoFs)’, that is the set of physico-chemical  
78 features shared by biologically active drugs: MW ≤500 Da (89%); N.HBA≤10 (93%); N.HBD≤5  
79 (97%); LogP ≤5 (85%) (**Supplementary Fig. 3**).<sup>28, 29</sup>

80

81 ***Chemical structure similarities induce a hierarchical network connecting drugs with***  
82 ***similar scaffolds and mode of action.***

83 We derived a *structural drug network* where each small molecule is a node and an edge  
84 connects two small molecules if they have a similar 3D structures. To this end, we computed the  
85 *structural distance* between each pair of small molecules based on the similarity between their 3D-  
86 pharmacophore quadruplet-based fingerprints (Methods and **Supplementary Fig. 4**).<sup>30</sup> A short

87 structural distance (i.e. close to 0) between two compounds indicates that they are structurally  
88 similar.

89 We obtained a symmetric 5,452x5,452 structure-based drug-distance matrix containing  
90 14,859,426 distances between all the possible pairs of drugs. We considered each compound as a  
91 node in the network and connected two nodes if their distance was below a threshold value  
92 (Methods). The resulting drug network consists of 5,312 nodes and 742,971 edges, corresponding  
93 to 5% of a fully connected network with the same number of nodes (14,859,426 edges)  
94 (<http://chemantra.tigem.it>). We subdivided the network into communities consisting of groups of  
95 densely interconnected nodes by means of the Affinity Propagation (AP) clustering algorithm<sup>31, 32</sup>  
96 on the network matrix (Methods).<sup>4</sup> We identified 288 communities (containing more than 3 drugs)  
97 across 5,302 drugs (out of 5,452) that group together compounds sharing similar chemical  
98 functionalities, scaffolds and sub-structural fragments. The AP clustering assigns to each  
99 community an “exemplar”, i.e. the drug whose structure best represents the structures of the other  
100 drugs in the community. By iteratively applying the AP clustering on the exemplars, we could  
101 further group communities into 42 *Rich Clubs*, i.e. *clusters* of drug communities that are structurally  
102 related but with distinct characteristic functional groups (**Fig. 1**).

103 To assess the structural network, we collected the ATC (Anatomical Therapeutic Chemical)  
104 code, an alphanumerical hierarchical pharmacological classification, for 936 out of 5452 drugs  
105 (Methods). We then verified that drugs connected in the network tend to share the same ATC code  
106 (**Supplementary Fig. 5**). We also verified that drugs within a community share a common  
107 therapeutic application. Indeed, 230 out of 288 (80%) structural communities were significantly  
108 enriched for compounds sharing the same ATC code (p-values <0.05) (**Supplementary Fig. 6**).  
109 These results demonstrate that inspection of the structural drug network can provide useful  
110 information on the drug mechanism of action and possibly help in identifying candidates for drug  
111 repositioning.

112

113 ***Chemical similarity between drugs is largely uncorrelated with similarity in induced***  
114 ***transcriptional responses in CMAP.***

115 In a previous study<sup>4,24</sup> we reported on the construction of a “transcriptional network” among  
116 1,309 small-molecules part of the CMAP dataset<sup>2</sup> (<http://mantra.tigem.it>) where two drugs are  
117 connected by an edge if they induce a similar transcriptional response. Briefly, in CMAP each  
118 transcriptional response is represented as a list of genes ranked according to their differential  
119 expression in the drug treatment versus control. Since each drug is associated to more than one  
120 ranked list (cell, dosage, etc.), to obtain the transcriptional network, we first computed a Prototype  
121 Ranked List (PRL) by merging together all the ranked lists referring to the same compound  
122 following the Borda Merging method to generate a single ranked list<sup>4</sup>. The PRL thus captures the  
123 consensus transcriptional response of a compound across different experimental settings,  
124 consistently reducing non-relevant effects due to toxicity, dosage, and cell line.<sup>4</sup> Transcriptional  
125 similarity was then quantified among the 1,309 PRLs (one for each drug) by Gene Set Enrichment  
126 Analysis and represented as a distance (i.e. 0 for identical responses, and greater than 0 if  
127 dissimilar)<sup>4</sup>. The transcriptional network was obtained by connecting two nodes if their distance  
128 was below a significant threshold value chosen so that the total number of edges is equal to 5% of  
129 a fully connected network with the same number of nodes (856,086 edges).

130 Here, we compared structural and transcriptional similarities among all pairs of drugs, part  
131 of the CMAP dataset, as shown in **Figure 2**, where each point is a drug-pair and its position in the  
132 plane represents the structural (x-axis) and transcriptional (y-axis) distance between the two drugs,  
133 for a total of 856,806 drug-pairs. The structural-transcriptional plane can be subdivided into four  
134 quadrants by straight lines representing the significance thresholds for the transcriptional (y-axis)  
135 and structural (x-axis) distances: quadrant I (5.1% of drug-pairs) contains drug-pairs with similar  
136 structures but inducing different transcriptional responses; quadrant II (0.3% of drug-pairs) contains  
137 coherent drug-pairs that are both structurally and transcriptionally similar; quadrant III (4.0% of  
138 drug-pairs) consists of drug-pairs with different structures but inducing similar transcriptional  
139 responses; finally drug-pairs different both in structure and transcription are found in quadrant IV

140 (91% of drug pairs). This quadrant contains most drug-pairs since two random drugs usually have  
141 no common function at all. We call drug-pairs in quadrant I and III *incoherent* because of the  
142 discrepancies between structural and transcriptional similarities, whereas drug-pair in quadrant II  
143 and IV are *coherent*.

144 Overall, **Figure 2** shows that the information detected by transcriptional responses and  
145 chemical structures tend to be different and independent of each other. We therefore decided to  
146 investigate the causes for this lack of correlation.

147

148 ***Chemically similar drugs do not induce similar transcriptional responses because of***  
149 ***weak transcriptional effects.***

150 Drug pairs sharing highly similar chemical structures but very different transcriptional  
151 responses are found in **Figure 2** (quadrant I). These drug-pairs exhibit an unexpected behaviour,  
152 since they are chemically similar molecules with the same therapeutic application (i.e. ATC code)  
153 but inducing very different transcriptional responses.

154 The most surprising example was the betamethasone/dexamethasone drug-pair in **Figure 2**  
155 (quadrant I). Both drugs are glucocorticosteroids binding the Glucocorticoid Receptor (GR) with  
156 very high affinity and nearly identical in structural since they are enantiomers of each other.  
157 Transcriptionally, on the contrary, these two drugs appear to be completely different  
158 (**Supplementary Fig. 8g**).

159 One possible explanation is that these compounds cause weak transcriptional effects in  
160 the cell lines used in CMAP, and thus the measured transcriptional responses are too noisy to be  
161 informative.

162 To assess whether a perturbation (e.g. drug treatment) leads to a strong and informative  
163 transcriptional response, we introduce the “transcriptional variability” score (TV). The TV score is  
164 based on the assumption that when the cellular context contains the necessary molecular *milieu* to  
165 make it responsive to a small molecule, then multiple treatments with the same compound will yield  
166 consistent and similar transcriptional responses.

167 We computed the TV of a small-molecule as follows: given M transcriptional responses to  
168 the same small-molecule in the same cell line (i.e. ranked list of differentially expressed genes as  
169 in CMAP), we evaluate the transcriptional distances between all the  $M(M-1)/2$  pairs of  
170 transcriptional responses and then take their median value as a measure of TV (if  $M = 2$  then TV is  
171 defined as the maximum distance). A TV close to 0 implies very similar transcriptional responses  
172 across replicates, indicating that the small molecule induces a reliable transcriptional response  
173 across all the experiments. On the contrary, a high TV implies very different transcriptional  
174 responses across replicates, hence a weak and unreliable transcriptional signature.

175 To assess whether TV is indeed able to detect informative versus non-informative  
176 transcriptional responses to small-molecules, we exhaustively computed the TV of 1165 CMAP  
177 drugs (out of 1309) for which at least two transcriptional responses in the same cell line were  
178 available (**Supplementary Table 1**). Out of the 1165, 858 (73%) have a TV score greater than the  
179 significance threshold implying that most drugs in CMAP induce a weak transcriptional response  
180 (Methods).

181 We compared the TV of drugs belonging to different classes, which were chosen because  
182 of their expected activity, or lack thereof, in the CMAP human cancer cell lines (**Fig. 3 and**  
183 **Supplementary Table 1**). As expected, glucocorticosteroids exhibit higher values of TV when  
184 compared to the other classes of drugs. Similarly, antibiotics and NSAIDs induce very weak  
185 transcriptional responses (high TV values). Indeed, antibiotics target bacteria-specific proteins,  
186 whereas NSAIDs act on cell-specific enzymatic pathways with marginal effects on transcription.  
187 Most antihistamines and antipsychotics induce weak transcriptional responses since they target  
188 specific cell membrane receptors lowly, or not expressed, in CMAP cancer cell lines and with no  
189 direct transcriptional effects.

190 We observed that drugs with a high TV, hence exhibiting a weaker transcriptional response,  
191 tend to have higher transcriptional distances from the other drugs in CMAP (i.e. they tend to be  
192 isolated in the network) and vice-versa (**Supplementary Fig. 7**). Consistently with this observation,  
193 compounds within these drug-classes tend to be found in drug-pairs belonging mostly in quadrant I

194 (structurally similar and transcriptionally different) and quadrant IV (structurally and transcriptionally  
195 different) as shown in **Supplementary Fig. 8**.

196 Conversely, drugs with the lowest TV (**Fig. 3 and Supplementary Table 1**), and thus with  
197 strong transcriptional responses, consist mostly of lipophilic molecules acting as protein synthesis  
198 inhibitors, chemotherapeutic drugs and other DNA/RNA intercalating agents, and histone  
199 deacetylase inhibitors, which all have a strong activity in most cell types (**Supplementary Fig. 9**).  
200 Interestingly, several cardiac glycosides were also found to have a low TV. As shown in  
201 **Supplementary Fig. 8**, in this case drug-pairs consisting of compounds in these drug-classes tend  
202 to be found in quadrant III (structurally different but transcriptionally similar).

203

204 ***Removing weak transcriptional responses from the CMAP dataset improves drug***  
205 ***classification performances.***

206 We reasoned that by removing drugs with a high TV, the performance of computational  
207 approaches based on gene expression to elucidate the MoA of a drug should improve.<sup>4, 24</sup> We thus  
208 partitioned the small molecules included in CMAP in two sets according to their TV score, obtaining  
209 a high-TV set and a low-TV set with the same number of drugs to facilitate the comparison. We  
210 then assessed the performance of the transcriptional distance between two drugs in correctly  
211 identifying those pairs sharing the same therapeutic application (i.e. the same ATC code), when  
212 using either drugs in the high-TV set or those in the low-TV set, as previously described.<sup>4</sup> As  
213 shown in **Figure 4**, the low-TV set performance far exceeds the high-TV set performance, which is  
214 almost random. Moreover, the correlation between structural distance and transcriptional distance  
215 in the chemical-transcriptional landscape of small molecules in **Figure 4** increases if only drugs in  
216 the low-TV set are used (**Supplementary Fig. 10**).

217 Overall, these results show that the TV score can discriminate between informative and  
218 non-informative transcriptional responses that result from the activity, or lack thereof, of small  
219 molecules in a specific cell line.

220



221 ***Drugs with different chemical structures and modes of action may induce similar***  
222 ***transcriptional responses related to lysosomal stress and phospholipidosis.***

223 **Figure 2** (quadrant III) includes drug-pairs with very different molecular structures but which  
224 are transcriptionally similar. We identified two obvious causes for the discrepancy between  
225 transcriptional and structural similarities: (i) most of the drug-pairs in this region have at least one  
226 drug with a very large size (usually a natural compound) (**Fig. 2 and Supplementary Fig. 11**)  
227 hence, global chemical similarity metrics, such as the one used here, may fail; (ii) the direct  
228 molecular targets of two drugs in a pair may be different but act in the same pathway (e.g. purine  
229 synthesis inhibitors methotrexate/mycophenolic-acid that act on different molecular targets but both  
230 block DNA synthesis, **Supplementary Fig. 11**)<sup>33-35</sup>.

231 **Figure 2** (quadrant III), however, contains also a large fraction of drug-pairs that are not  
232 large molecules and do not act in the same pathway, nor share the same therapeutic application,  
233 but nevertheless have very similar transcriptional profiles. To investigate why this is the case, we  
234 ranked drug-pairs in this quadrant by their transcriptional distance in ascending order  
235 (**Supplementary Table 2**). We noticed that the top-ranked most transcriptionally similar drug-pairs  
236 included well known “lysosomotropic agents” inducing large vacuolization in cells such as  
237 astemizole, terfenadine and mefloquine (**Table 1**).<sup>36-38</sup> Among these agents, astemizole and  
238 terfenadine are no longer in use because of cardio-toxicity caused by their potassium channel  
239 blocker activity (hERG encoded by *KCNH2*), which may lead to fatal cardiac arrhythmia.<sup>39, 40</sup> The  
240 lysosomotropic effect of these small molecules has been attributed to their ability to cross  
241 lysosomal membrane and remain trapped within the lysosome by a mechanism known as pH  
242 partitioning.<sup>41 42-44</sup> Most lysosomotropic agents belong to the class of cationic amphiphilic drugs  
243 (CADs) containing both a hydrophobic and a hydrophilic domain. CADs have increased probability  
244 to cause drug-induced phospholipidosis (PLD),<sup>45</sup> a lysosomal storage disorder characterized by the  
245 accumulation of phospholipids within the lysosome by unclear molecular mechanisms, leading to  
246 cellular stress.<sup>46-50</sup> Indeed among the lysosomotropic drugs involved in the most transcriptionally

247 similar drug-pairs (**Table 1**), there were also three known PLD inducing drugs (astemizole,  
248 suloctidil and trifluoperazine).

249 We hypothesised that “lysosomotropic” stress induced by these compounds could explain  
250 their similarity in transcriptional responses. We therefore selected 187 CAD compounds present in  
251 CMAP according to their physico-chemical properties ( $\text{LogP} > 3$ ;  $\text{pKa} > 7.4$ )<sup>43</sup>. Within these CAD  
252 compounds, we searched the literature for lysosomotropic drugs known to induce PLD,<sup>45</sup> which,  
253 according to our hypothesis, should elicit a strong transcriptional response. We thus identified a  
254 total of 35 compounds (PLD/CAD) (**Supplementary Table 3**).

255 We verified that PLD/CAD compounds tend to induce a stronger transcriptional response  
256 (i.e. a lower TV) (**Supplementary Fig. 12**) and they tend to be transcriptionally similar among them  
257 (but not structurally) despite having different mode of action and therapeutic applications  
258 (**Supplementary Fig. 13**).

259 We next asked which genes were transcriptionally modulated by the majority of PLD/CAD  
260 compounds. We performed Drug Set Enrichment Analysis (DSEA),<sup>51</sup> a computational approach we  
261 recently developed to identify gene-sets that are transcriptionally modulated by most drugs in a  
262 given set. The most significant gene-set shared by the 35 PLD/CAD compounds, out of about  
263 5,000 gene-sets within the Gene Ontology (GO) database, was the GO-Cell Component term  
264 “lysosome” consisting mainly of genes coding for lysosomal enzymes and ion channels  
265 ( $p=5.03 \times 10^{-8}$  – **Supplementary Table 4**), thus in agreement with the “lysosomotropic” effect of  
266 these drugs.

267 Recently, the transcription factor E-box (TFEB) has been found to be a major player in the  
268 transcriptional control of lysosomal genes in response to a variety of cellular and environmental  
269 stresses.<sup>52</sup> In normal nutrient conditions TFEB is phosphorylated by the mTORC1 complex on the  
270 lysosomal surface. This phosphorylation favours TFEB binding to 14-3-3 proteins and its retention  
271 in the cytoplasm.<sup>53-55</sup> Upon stress signal, such as nutrient deprivation, mTOR is inhibited, the  
272 calcium-dependent phosphatase Calcineurin is activated, and TFEB is de-phosphorylated shuttling  
273 to the nucleus where it transcriptionally controls lysosomal biogenesis, exocytosis and

274 autophagy.<sup>53-59</sup> Moreover, TFEB was shown to translocate to the nucleus upon amiodarone  
275 treatment, a well known lysosomotropic agent.<sup>60</sup> We thus decided to investigate whether TFEB  
276 activation was responsible for the characteristic transcriptional response induced by PLD/CAD  
277 compounds.

278

### 279 ***The transcriptional response of PLD-inducing compounds is mediated by TFEB***

280 We performed a panel of High Content Screening assays including the TFEB nuclear  
281 translocation assay (TFEB-NT)<sup>59</sup> at 3h and 24h following drug administration at different  
282 concentrations (0.1 $\mu$ M, 1 $\mu$ M and 10 $\mu$ M) for 34 out of 35 PLD drugs (1 drug was not available to us  
283 at the time). Additional HCS assays at 24h included LAMP-1 immunostaining and LysoTracker dye  
284 to quantify lysosomal compartment (Methods), GM130 and PDI immunostaining to detect  
285 morphological changes in the Golgi and ER (Endoplasmic Reticulum) compartments, both of which  
286 have been recently suggested to be involved in PLD aetiology (Methods). We also performed the  
287 LipidTox assay at 48h to check for the accumulation of phospholipids to confirm PLD at least in  
288 vitro (Methods).

289 Quantification of the HCS assays for the 34 PLD drugs are reported in **Supplementary**  
290 **Figure 13** and Supplementary **Table 5**. Nuclear translocation of TFEB at 3h was observed for 18  
291 out of 34 drugs (53%) increasing to 29 drugs at 24h (85%). Out of these 29 drugs, 27 induced an  
292 increase in lysosome size and number as evidenced by LAMP1 and LysoTracker staining, and all  
293 29 drugs induced accumulation of phospholipids according to the Lipidtox assay (100%). Only 5  
294 drugs did not induce TFEB translocation at 24h, and just 1 out of these 5 drugs was positive in the  
295 LysoTracker assay, while 4 of them were positive in the Lipidtox assay. None of the drugs tested  
296 were positive for the Golgi marker and only 6 were positive for the ER marker, albeit marginally.

297 Overall, HCS confirmed a concentration dependent nuclear translocation of TFEB for 29 out  
298 of 34 drugs (85% at 24h) with a concomitant perturbation of the lysosomal compartment for 28 out  
299 of 34 drugs (82%) occurring mostly at the highest dosage tested (10  $\mu$ M). Furthermore, HCS

300 revealed an accumulation of lipid in vitro at 48h following treatment with the 34 drugs (100%) at the  
301 highest dosage tested (10  $\mu$ M), as previously reported in the literature.<sup>45</sup>

302 These results support the role of TFEB in shaping the transcriptional response of cells  
303 treated with PLD inducing drugs in a way completely unrelated to their MoA. We next asked  
304 whether the activation of TFEB (or TFE3, another member of the MiT family of transcription factors  
305 with similar functions) is a consequence of lysosomal stress upon compound treatment or if it is  
306 directly related to the induction of the PLD phenotype. Thus, we set up a HCS Lipidtox assay using  
307 TFEB wt versus TFEB/TFE3 KO in HeLa cell type, administering high dosage of chloroquine (50  
308  $\mu$ M) known to induce lipids accumulation in cells at 48h. **Supplementary Fig. 15a, b** show no  
309 major differences in terms of spot intensity in the Lipidtox assay, thus confirming that TFEB  
310 activation is a consequence of lysosomal stress and not an inducer of PLD.

311 As this manuscript was under review, Lu et al reported an increase in TFEB, TFE3 and  
312 MITF translocation to the nucleus in ARPE-19 cells together with lysosomal activation and lipid  
313 accumulation following treatment with 8 lysosomotropic compounds, well in agreement with our  
314 results.<sup>50</sup>

315

316 ***A PLD-specific transcriptional signature can predict compounds inducing lipid***  
317 ***accumulation.***

318 We combined the transcriptional responses elicited by the 35 PLD/CAD compounds into a  
319 consensus transcriptional response (“PLD” signature) and computed its transcriptional distance  
320 from all the other 1274 (i.e. 1309-35) CMAP compounds (Methods). We reasoned that drugs  
321 inducing a transcriptional profile similar to the PLD signature should have a higher probability of  
322 inducing lipid accumulation than the other drugs. Surprisingly, 258 compounds out of 1274 (20%)  
323 cMAP compounds were found to be similar to the PLD signature (**Supplementary Table 6**). About  
324 a third of these drugs are CADs (77 out of 258 (30%)).

325 **Figure 5** reports a breakdown by ATC classes of drugs for which an ATC code was  
326 available and that were found to induce a transcriptional response similar to the PLD signature.

327 Some drug classes (ATC classes N05, N06 and R06 including antihistamines and antipsychotics)  
328 are enriched for known PLDs<sup>45, 47</sup>. Other classes cause global cellular stress responses not  
329 mediated by their physico-chemical properties, but rather because of their direct molecular targets,  
330 such as anticancer compounds that block cell-cycle (e.g. ATC class L01 composed of CDK2 and  
331 Topoisomerase I, II inhibitors). Anthelmintics (ATC P02) and antifungals (ATC D01), despite being  
332 neither CADs nor PLDs, were also found among the PLD node's neighbours. Several recent  
333 reports in the literature have found anthelmintics to induce an anti-proliferative effect in cancer cell  
334 lines by indirectly inhibiting the mTOR pathway thus inducing TFEB activity, which may explain  
335 their PLD-like transcriptional response.<sup>55, 60-63</sup> Calcium channel blockers were also found to induce  
336 a transcriptional response similar to PLDs, which may be expected since calcium signalling has  
337 been involved in autophagy regulation and lysosomal function.<sup>59</sup> Interestingly, some cardenolides  
338 (ATC C01 and C07) were also found to contain the PLD signature, despite not being CADs  
339 (median distance equal to 0.71).<sup>64, 65</sup>

340 To experimentally validate the usefulness of the PLD transcriptional signature in identifying  
341 novel PLD drugs, we selected the top quartile of the 258 drugs (i.e. 25% of 258=64 drugs) with the  
342 shortest transcriptional distance to the PLD node and performed HCS for lipid accumulation  
343 following drug treatment at three different concentrations (Lipidtox assay) (**Supplementary Table**  
344 **7**). Twenty-two out of the top 64 small molecules were present in our HCS small-molecule library.  
345 Overall 11 out of 22 (50%) compounds were positive to the Lipidtox assay (**Supplementary Table**  
346 **7**), including Terfenadine, a cardiotoxic lysosomotropic CAD, not reported to be a PLD inducer in  
347 the literature, which caused a strong accumulation of lipids, as shown in **Figure 6** (LipiTox Intensity  
348 Spot: 450.93 at a concentration of 10 $\mu$ M).

349 Overall, our data demonstrate the value of the PLD transcriptional signature in identifying  
350 compounds potentially inducing lysosomal stress and phospholipidosis.

351

352 **The PLD transcriptional signature affects transcriptional responses to drug treatment in a**  
353 **concentration dependent manner.**

354 We next investigated whether the PLD expression signature was linked to the elevated drug  
355 concentration used in the CMAP experiments, in agreement with the HCS results indicating a dose  
356 dependent TFEB nuclear translocation (**Supplementary Fig. 14**). Indeed 5,747 out 6,100 CMAP  
357 gene expression profiles (94%) were measured at high drug concentrations ranging from 1 $\mu$ M to  
358 10 mM, while the remaining 353 (6%) at lower concentrations ranging from 10nM to 0.5  $\mu$ M. We  
359 thus searched CMAP for PLD-inducing drugs for which both high and low concentration instances  
360 were present. We selected 5 drugs (out of 35 PLD) drugs: raloxifene (ER antagonist at 0.1  $\mu$ M and  
361 7.8  $\mu$ M), tamoxifen (ER antagonist at 1  $\mu$ M and 7.0  $\mu$ M), amitriptyline (antidepressant 1  $\mu$ M and  
362 12.8  $\mu$ M), thioridazine (antipsychotic at 1  $\mu$ M and 10  $\mu$ M) and chlorpromazine (antipsychotic at 1  
363  $\mu$ M and 11.2  $\mu$ M). We then generated two additional transcriptional responses (LOW and HIGH)  
364 for each of these 5 drugs by analysing separately the low and high concentration experiments  
365 (**Methods, Supplementary Figure 15 and Supplementary Table 8**).

366 The HIGH transcriptional responses for the 5 drugs were more similar to the PLD signature  
367 than the corresponding LOW transcriptional responses (**Supplementary Table 8**), confirming an  
368 increased alteration of the transcriptional response caused by high drug dosages. Moreover, the  
369 HIGH transcriptional responses of 4 out of 5 drugs were connected to a much larger number of  
370 drugs in the transcriptional network when compared to their LOW transcriptional response  
371 counterparts (**Supplementary Fig. 16**). Raloxifen, a selective estrogen receptor modulator  
372 (SERM), is the only drug tested also at sub-micromolar concentrations (0.1  $\mu$ M). When using the  
373 HIGH transcriptional response, raloxifene is predicted to be transcriptionally similar to 154  
374 compounds (**Supplementary Fig. 16 and Supplementary Table 8**), none of which behaving as a  
375 SERM, with the most similar being trifluoperazine, an antipsychotic drug with known PLD-inducing  
376 properties. On the contrary, when the LOW transcriptional response is used, raloxifene is predicted  
377 to be transcriptionally similar only to 4 compounds, the most similar one being tamoxifen, a well-  
378 known SERM.

379

380 **Discussion**

381 By analysing a large set of chemical structures, we generated a network representing  
382 structural similarities among compounds that can be used to automatically group together drugs  
383 with similar scaffolds and mode-of-action. Other methods to cluster drugs based on structural  
384 similarity have been proposed in the literature<sup>16</sup> but no hierarchical classification of drugs in  
385 communities and rich-clubs based on the network structure has been previously performed. By  
386 comparing the structural drug network with the transcriptional drug network, we observed broad  
387 differences between the two: drugs can be very similar in terms of the transcriptional response they  
388 induce, but with unrelated chemical structures, or vice-versa have very similar structures but  
389 induce diverse transcriptional responses.

390 Here, we identified a set of confounding factors that can hinder the usefulness of  
391 transcriptional based methods. We introduced a simple but powerful measure, “Transcriptional  
392 Variability” (TV), to assess the strength and robustness of the transcriptional response of a cell to a  
393 drug treatment.

394 In the original CMAP study,<sup>2</sup> the authors indeed recognised that although gene-expression  
395 signatures can be highly sensitive, they may be uninformative if measured in cells that lack the  
396 appropriate physiological or molecular context, but offered no solution to identify such cases. We  
397 observed that glucocorticoids tend to have a high TV, hence uninformative transcriptional profiles.  
398 Indeed, MCF7,<sup>66, 67</sup> HL60 and PC3<sup>68, 69</sup> cell lines used in CMAP may exhibit resistance to  
399 glucocorticosteroids<sup>2</sup>. Hence, if not filtered out, computational analysis of their transcriptional  
400 responses may be misleading and lead to wrong conclusions, e.g. such that betamethasone and  
401 dexamethasone have a different mode of action (**Figure 2**).

402 We also uncovered a transcriptional signature common to a subset of transcriptionally  
403 similar but structurally distinct drugs profiled in CMAP that is not related to their mode of action, but  
404 rather to cellular toxicity caused by lysosomal stress and lipid accumulation.

405 We further demonstrated by HCS that PLD inducing drugs have little effect on ER and Golgi  
406 morphology, but rather increase the number and size of lysosomes, as previously reported in the  
407 literature, and induce the nuclear translocation of the transcription factor TFEB, a master regulator

408 of lysosomal biogenesis and autophagy. We show that the transcriptional signature present in the  
409 transcriptional response of PLD inducing drugs is mainly driven by TFEB activation. These results  
410 may help in further elucidating the effect of lysosomotropic PLD-inducing drugs on autophagy.<sup>70</sup>  
411 Moreover, the PLD transcriptional signature may be a useful tool for identifying and repositioning  
412 drugs as inducers of TFEB activation and thus of autophagy.<sup>57</sup>

413 Our findings are relevant for all those studies relying on CMAP transcriptional responses to  
414 determine drug mode of action and for drug repositioning. Here, we show that very high and not  
415 physiological compound concentrations, such as the ones used in the CMAP dataset, increase the  
416 chance of off-target effects including lysosomotropism and phospholipidosis. Somewhat  
417 surprisingly, despite the high concentrations used, only a minority of compounds in CMAP (~30%)  
418 have reproducible transcriptional responses (TV<0.8). Notwithstanding these limitations, the CMAP  
419 still contains relevant information on drug activity if properly analysed, allowing to correctly  
420 discriminate among different classes of drugs<sup>3</sup> and it can provide complementary information to  
421 that obtained by HCS.<sup>4, 71-73</sup>

422 Based on the results here presented, we suggest guidelines to prevent inconsistencies and  
423 erroneous conclusion when using transcriptional responses of small molecules for drug discovery  
424 and drug repositioning: (i) the transcriptional response elicited by a drug can be uninformative.  
425 Hence these responses must be detected and then excluded from further analyses. We  
426 demonstrated that this can be achieved by assessing the Transcriptional Variability (TV) of the  
427 drug-induced transcriptional response across multiple replicates; (ii) drug treatment can cause  
428 cellular stress unrelated to the drug MoA and thus affect the drug-induced transcriptional response  
429 by partially masking transcriptional changes directly related to the drug molecular targets. We  
430 generated a PLD transcriptional signature which can be used to detect these compounds. This  
431 signature is particularly strong if drug concentrations used to treat cells are above their clinically  
432 relevant concentrations. One way to avoid this is to use clinically relevant (sub-micromolar)  
433 concentrations; (iii) in the case of natural compounds, computational approaches based on



434 transcriptional responses maybe more informative than those based on structural approaches,  
435 because of the large size and molecular complexity of these compounds.

436

## 437 **Methods**

438

### 439 ***Compounds***

440 We retrieved the chemical structure of 5500 small-molecules part of the Library of Integrate  
441 Network-based Cellular Signatures (LINCS - <http://lincscloud.org>) project in the form of SMILES  
442 string annotations (Supplementary Information). 4719 out of 5500 SMILES strings were retrieved  
443 according to their annotated ChemSpider ID (CSID) and PubChem ID (PID) in the NIH LINCS  
444 database. The remaining 779 NHS LINCS structures, for which no CSID or PID annotation was  
445 found, were retrieved by a web-API search in ChemSpider according to the molecule names. Six  
446 compounds were restricted structures. Thus, a final collection of 4927 LINCS unique structures  
447 was obtained. In addition, we retrieved chemical structures for the 1309 small-molecules part of the  
448 CMAP dataset (Connectivity Map).<sup>2, 7</sup> 784 out of 1309 small-molecules were already present  
449 among the 4929 LINCS unique structures. Thus only 523 unique CMAP structures were retrieved  
450 as described before (**Supplementary Fig. 1**). The total number of chemical structure used for  
451 further analysis was thus equal to 5452.

452 The ChemAxon Standardizer tool (v. 14.9) was run to convert SMILES string annotations  
453 into 2D multi-SDF structural files.<sup>74</sup> The “remove fragments” and “neutralize” options were used to  
454 fix all the molecular structures, to remove counter-ions and other various kinds of molecular  
455 fragments, which may be present in branded drug formulation but not useful in this work (e.g.  
456 besilates, mesilates, chlorides, bromides, sulphates, etc.). Protonation state of each structure was  
457 calculated with MoKa software v. 2.0 considering physiological pH 7.4.<sup>75</sup>

458 Finally, 3D minimized conformations were generated with the MMFF4x force-field in the  
459 MOE software (v. 2013)<sup>76</sup> and stored as 3D multi-SDF structural files. The MMFF4x is the standard  
460 force-field parameterised for small organic molecules such as drugs. Partial charges are based on

461 bond-charge increments. Conjugated nitrogens are considered as planar. Thus, a unique 3D multi-  
462 SDF file was obtained and used as input file for all the subsequent analyses.

463

### 464 ***Physicochemical and pharmacokinetic properties***

465 Starting from the 3D-coordinates multi-SDF file, each structure was the imported in the Volsurf+  
466 v.1.5 software<sup>27</sup> normalising their protonation state at pH 7.4. A set of 128 physicochemical and  
467 pharmacokinetic descriptors were calculated using Volsurf+ v. 1.5, using a grid spatial resolution of  
468 0.5 Å. A final matrix of 5452 objects (drugs and chemical substances) and 128 descriptors was  
469 thus obtained. The molecular descriptors matrix was then visualised through the Principal  
470 Component Analysis (PCA) tool integrated in Volsurf+. Only the first five PCs were considered for  
471 the analysis. PCA score and loading plots are shown in **Supplementary Figure 2a** and **2b**.  
472 Analysis of the physicochemical descriptor distribution plots are shown in **Supplementary Figure**  
473 **3**.

474

### 475 ***3D structural similarities by pharmacophore descriptors***

476 The software FLAP v. 2.0<sup>30</sup> was used to compute all-against-all pair-wise 3D structural  
477 similarities among the 5452 compounds. FLAP allows 3D molecular superimposition of two  
478 molecules and computes a pairwise similarity score based on Molecular Interaction Fields (MIFs),  
479 in order to evaluate type, strength, and direction of the interactions a molecule can have. The  
480 GRID tool,<sup>23</sup> part of the FLAP software was used to compute the Molecular Interaction Fields  
481 based on three interaction probes: H, DRY and OH2. The hydrogen probe H is used to compute  
482 the shape of a small molecule. The hydrophobic probe DRY finds places at which hydrophobic  
483 atoms on the surface of a target molecule will make favourable interactions with hydrophobic  
484 ligand atoms. The probe OH2 represents polar and hydrophilic interactions mainly generated by  
485 hydrogen bond donor and acceptor functional groups and charges interactions. Four-point  
486 pharmacophores derived from the MIFs were used to align molecules with specific biological  
487 activity.<sup>30, 77, 78</sup> The evaluation of MIF volume superimpositions between the two structures is

488 reported as a similarity score ranging from 0 to 1 for each of the three probes. A global score  
489 (GLOB-Sum) is then obtained as the sum of the three scores of the individual probes. Higher  
490 GLOB-S values correspond to more similar structures. For this study, we transformed the GLOB-  
491 Sum similarity score matrix (**S**) of dimension 5452x5452 into a distance matrix defined as  $D=1-S/3$ .

492 Since the distance matrix is symmetric (i.e. the distance between A and B is the same as  
493 the distance between B and A), the total number of drug-pairs to consider is 14,859,426 (5452 x  
494 5451 /2).

#### 495 ***Construction of the drug network***

496 We ranked drug-pairs according to their structural distance in ascending order and  
497 considered as significant only those drug-pairs in the top 5% of the ranked list, as previously  
498 described by Iorio et. al.<sup>4</sup> to reduce the total amount of edges in the MANTRA network (The  
499 distance threshold is 0.51 when considering the 5452x5452 network or 0.65 when considering only  
500 the CMAP 1309x1309 sub-network). We then represented drugs as nodes connected by edges.  
501 The resulting Structural Drug Network has a giant connected component with 5312 nodes (i.e.,  
502 drugs) out of 5,452 and 35,527 edges, corresponding to 5% of a fully connected network with the  
503 same number of nodes (14,859,426 edges) (**Supplementary Fig. 4**). In order to visualise and  
504 extract useful information from the SDN, we identified communities via the Affinity Propagation  
505 Clustering algorithm, as implemented in the R package apcluster (v. 1.3.5).<sup>32, 79</sup> A community is  
506 defined as a group of nodes densely interconnected with each other and with fewer connections to  
507 nodes outside the group.<sup>80</sup> Each community was coded with a numerical identifier, a colour, and  
508 one of its nodes was identified as the “exemplar” of the community, i.e., the drug whose effect best  
509 represents the effects of the other drugs in the community.<sup>4</sup>

510

511

#### 512 ***Validation of the Structural Drug Network***

513 To validate the drug structural network, we assessed whether pairs of drugs connected by  
514 an edge in the network (i.e. structurally similar according to our distance) shared a common clinical

515 application. To this end, we collected for each drug the correspondent Anatomical Therapeutic  
516 Chemical (ATC) code (version Index 2014). This drugs classification method developed by the  
517 World Health Organization in collaboration with the Drug Statistics Methodology (WHOCC),<sup>81</sup>  
518 hierarchically classifies compounds according to five different levels: (1st level) Organ or system  
519 on which they act; (2nd level) Therapeutic class; (3rd level) Pharmacological subgroup; (4th level)  
520 Chemical subgroup; (5th level) Compound identifier. ATC code collisions often occur for the same  
521 drug. For instance, Aspirin has three distinct ATC codes: A01AD05 (drug for alimentary tract and  
522 metabolism), B01AC06 (blood agent as platelet inhibitor) and N02BA01 (nervous system agent as  
523 analgesic and antipyretic). In such cases we considered multiple ATC codes for the same drug in  
524 the network. ATC codes available from the WHOCC were 936 out of 5452 drugs (17%).

525 We then sorted drug-pairs according their structural distance in ascending order and for  
526 each drug-pair we checked whether they shared the same ATC to assess whether it was a True  
527 Positive (TP) or a False Positive (FP). **Supplementary Figure 6** reports the  $PPV=TP/(TP+FP)$   
528 versus the drug-pair distance for different ATC code levels.

529 Furthermore, in order to assess whether a community in the drug network was enriched for  
530 a common ATC code, we counted the number of drugs with the same ATC code at the 4th level  
531 (pharmacological subclass) in community. We then computed a p-value for each community by  
532 applying the hypergeometric probability distribution test.

533

#### 534 ***Transcriptional Variability score***

535 TV was computed for all the compounds having at least two profiles available in CMAP for  
536 the same cell line. The number of such small molecules for each cell line is: 1165 in MCF7, 398 in  
537 PC3, 32 in HL60, 2 in ssMCF7. We took advantage of the large majority of MCF7 experiments to  
538 avoid the problematic integration of TV values across different cell types and discarded all non-  
539 MCF7 data. About 15% of the CMAP small molecules have more than two profiles in MCF7 cells,  
540 producing an average of 16.08 “within-molecule” profile pairs and a maximum of 630 (for  
541 tanespimycin). To obtain the TV for a small molecule we computed the median of all the distances

542 between such pairs. The pairwise distance is based on the enrichment of the top (bottom) genes of  
543 one profile among the top (bottom genes) of the other profile and vice-versa, as detailed in Iorio et  
544 al.<sup>4</sup> Since the TV is based on the same transcriptional distance measure used to derive the  
545 transcriptional network in Iorio et al<sup>4</sup>, we set as a significance threshold for the TV the same  
546 threshold used to derive the transcriptional network ( $TV_{th}=0.8$ ).

547

548

#### 549 ***Phospholipidosis stress signature***

550 The PLD stress signature was built by merging together 35 PRLs (prototype ranked lists),  
551 corresponding to drugs searched in the literature known to induce PLD,<sup>45</sup> into a single node using  
552 the Kruskal Algorithm strategy and the Borda Merging Method implemented the online tool  
553 MANTRA (<http://mantra.tigem.it>) and previously described<sup>3</sup>. Briefly, the algorithm first searches for  
554 the two ranked lists with the smallest Spearman's Footrule distance. Then it merges them using  
555 the Borda Merging Method, obtaining a new ranked list of genes. The process restarts until only  
556 one list remains.

557

#### 558 ***HCS (High Content Screening) assays***

559 *TFEB nuclear translocation:* To quantify TFEB subcellular localization, a high-content assay  
560 upon the compound treatments indicated was performed using stable HeLa cells overexpressing  
561 TFEB-GFP according to our previous protocols (Medina et al, 2015). *Lysosome, Golgi and*  
562 *Endoplasmic Reticulum assays:* HeLa cells were seeded in a 384-well plate, incubated for 24h and  
563 treated with the different compounds at 0.1, 1 and 10  $\mu$ M for additional 24h. After that cells were  
564 fixed with 4% paraformaldehyde (for LAMP1 and GM130 stainings) or ice-cold methanol (for PDI  
565 staining) and permeabilized/blocked with 0.05% (w/v) saponin, 0.5% (w/v) BSA and 50 mM NH<sub>4</sub>Cl  
566 in PBS (blocking buffer). LAMP-1, GM130 and PDI detection was performed by incubating with the  
567 corresponding primary antibodies (anti-LAMP1, Santa Cruz Biotechnology; anti-GM130 and anti-

568 PDI, Cell Signaling Technology) followed by the incubation with an AlexaFluor-conjugated  
569 secondary antibodies (Life Technologies) diluted in blocking buffer. LysoTracker Red DND-99 (Life  
570 Technologies) staining was performed by the incubating the dye for the last 30 minutes before  
571 fixation. DAPI and CellMask Deep Red Plasma membrane Stain (Life Technologies) were used for  
572 nuclei and plasma membrane staining, respectively. Images of of lysosomes (LAMP-1 and  
573 LysoTracker Red DND-99), Golgi (GM130) and ER (PDI) were acquired using an automated  
574 confocal microscopy (Opera High Content System, Perkin-Elmer). The fluorescent intensity and  
575 area of the different stainings were analyzed by using dedicated scripts developed in the Columbus  
576 Image Data Management and Analysis Software (Perkin-Elmer).

577 *High Content Lipid accumulation assay:* LipidTOX green phospholipidosis detection reagent (Life  
578 Technologies) was added to the cells along with the different compounds at the indicated  
579 concentrations for 48h before fixation with 4% paraformaldehyde. DAPI and CellMask Deep Red  
580 Plasma membrane Stain (Life Technologies) were used for nuclei and plasma membrane staining,  
581 respectively. Lysosomal phospholipid accumulation was analyzed by measuring fluorescent dye  
582 intensity using an automated confocal microscopy (Opera High Content System, Perkin-Elmer) and  
583 a Columbus Image Data Management and Analysis Software (Perkin-Elmer).

584

585

586 **References**

- 587 1. Verbist, B. et al. Using transcriptomics to guide lead optimization in drug discovery projects:  
588 Lessons learned from the QSTAR project. *Drug Discov Today* **20**, 505-513 (2015).
- 589 2. Lamb, J. et al. The Connectivity Map: Using Gene-Expression Signatures to Connect Small  
590 Molecules, Genes, and Disease. *Science* **313**, 1929-1935 (2006).
- 591 3. Cheng, J., Yang, L., Kumar, V. & Agarwal, P. Systematic evaluation of connectivity map for  
592 disease indications. *Genome Medicine* **6**, 95 (2014).
- 593 4. Iorio, F. et al. Discovery of drug mode of action and drug repositioning from transcriptional  
594 responses. *Proceedings of the National Academy of Sciences* **107**, 14621-14626 (2010).
- 595 5. Woo, J.H. et al. Elucidating Compound Mechanism of Action by Network Perturbation  
596 Analysis. *Cell* **162**, 441-451 (2015).
- 597 6. Kidd, B.A. et al. Mapping the effects of drugs on the immune system. *Nat Biotechnol* **34**,  
598 47-54 (2016).
- 599 7. Lamb, J. The Connectivity Map: a new tool for biomedical research. *Nat Rev Cancer* **7**, 54-  
600 60 (2007).
- 601 8. Iorio, F., Rittman, T., Ge, H., Menden, M. & Saez-Rodriguez, J. Transcriptional data: a new  
602 gateway to drug repositioning? *Drug Discov Today* **18**, 350-357 (2013).
- 603 9. Bajorath, J. et al. Navigating structure–activity landscapes. *Drug Discovery Today* **14**, 698-  
604 705 (2009).
- 605 10. Geppert, H., Vogt, M. & Bajorath, J. Current trends in ligand-based virtual screening:  
606 molecular representations, data mining methods, new application areas, and performance  
607 evaluation. *J Chem Inf Model* **50**, 205-216 (2010).
- 608 11. Heikamp, K. & Bajorath, J. The Future of Virtual Compound Screening. *Chemical Biology &*  
609 *Drug Design* **81**, 33-40 (2013).
- 610 12. Shim, J. & Mackerell, A.D., Jr. Computational ligand-based rational design: Role of  
611 conformational sampling and force fields in model development. *Medchemcomm* **2**, 356-  
612 370 (2011).

- 613 13. Sirci, F. et al. Virtual fragment screening: discovery of histamine H3 receptor ligands using  
614 ligand-based and protein-based molecular fingerprints. *J Chem Inf Model* **52**, 3308-3324  
615 (2012).
- 616 14. Stumpfe, D. & Bajorath, J. Activity Cliff Networks for Medicinal Chemistry. *Drug*  
617 *Development Research* **75**, 291-298 (2014).
- 618 15. Vogt, M. & Bajorath, J. Chemoinformatics: A view of the field and current trends in method  
619 development. *Bioorganic & Medicinal Chemistry* **20**, 5317-5323 (2012).
- 620 16. Backman, T.W., Cao, Y. & Girke, T. ChemMine tools: an online service for analyzing and  
621 clustering small molecules. *Nucleic Acids Res* **39**, W486-491 (2011).
- 622 17. Ma, X.H. et al. Comparative analysis of machine learning methods in ligand-based virtual  
623 screening of large compound libraries. *Combinatorial chemistry & high throughput*  
624 *screening* **12**, 344-357 (2009).
- 625 18. Ravindranath, A.C. et al. Connecting gene expression data from connectivity map and in  
626 silico target predictions for small molecule mechanism-of-action analysis. *Mol Biosyst* **11**,  
627 86-96 (2015).
- 628 19. Khan, S.A. et al. Identification of structural features in chemicals associated with cancer  
629 drug response: a systematic data-driven analysis. *Bioinformatics* **30**, i497-504 (2014).
- 630 20. Iskar, M. et al. Drug-induced regulation of target expression. *PLoS Comput Biol* **6** (2010).
- 631 21. Hizukuri, Y., Sawada, R. & Yamanishi, Y. Predicting target proteins for drug candidate  
632 compounds based on drug-induced gene expression data in a chemical structure-  
633 independent manner. *BMC Med Genomics* **8**, 82 (2015).
- 634 22. Carosati, E., Sciabola, S. & Cruciani, G. Hydrogen Bonding Interactions of Covalently  
635 Bonded Fluorine Atoms: From Crystallographic Data to a New Angular Function in the  
636 GRID Force Field. *Journal of Medicinal Chemistry* **47**, 5114-5125 (2004).
- 637 23. Goodford, P.J. A computational procedure for determining energetically favorable binding  
638 sites on biologically important macromolecules. *Journal of Medicinal Chemistry* **28**, 849-857  
639 (1985).



- 640 24. Carrella, D. et al. Mantra 2.0: an online collaborative resource for drug mode of action and  
641 repurposing by network analysis. *Bioinformatics* **30**, 1787-1788 (2014).
- 642 25. Iorio, F., Isacchi, A., di Bernardo, D. & Brunetti-Pierri, N. Identification of small molecules  
643 enhancing autophagic function from drug network analysis. *Autophagy* **6**, 1204-1205  
644 (2010).
- 645 26. Cruciani, G., Crivori, P., Carrupt, P.A. & Testa, B. Molecular fields in quantitative structure–  
646 permeation relationships: the VolSurf approach. *Journal of Molecular Structure:*  
647 *THEOCHEM* **503**, 17-30 (2000).
- 648 27. Cruciani, G., Pastor, M. & Guba, W. VolSurf: a new tool for the pharmacokinetic  
649 optimization of lead compounds. *European Journal of Pharmaceutical Sciences* **11**,  
650 **Supplement 2**, S29-S39 (2000).
- 651 28. Lipinski, C.A. Lead- and drug-like compounds: the rule-of-five revolution. *Drug Discov*  
652 *Today Technol* **1**, 337-341 (2004).
- 653 29. Lipinski, C.A., Lombardo, F., Dominy, B.W. & Feeney, P.J. Experimental and computational  
654 approaches to estimate solubility and permeability in drug discovery and development  
655 settings. *Advanced Drug Delivery Reviews* **23**, 3-25 (1997).
- 656 30. Baroni, M., Cruciani, G., Sciabola, S., Perruccio, F. & Mason, J.S. A common reference  
657 framework for analyzing/comparing proteins and ligands. Fingerprints for Ligands and  
658 Proteins (FLAP): theory and application. *J Chem Inf Model* **47**, 279-294 (2007).
- 659 31. Bodenhofer, U., Kothmeier, A. & Hochreiter, S. APCluster: an R package for affinity  
660 propagation clustering. *Bioinformatics* **27**, 2463-2464 (2011).
- 661 32. Frey, B.J. & Dueck, D. Clustering by passing messages between data points. *Science* **315**,  
662 972-976 (2007).
- 663 33. Baliga, B.S., Pronczuk, A.W. & Munro, H.N. Mechanism of cycloheximide inhibition of  
664 protein synthesis in a cell-free system prepared from rat liver. *J Biol Chem* **244**, 4480-4489  
665 (1969).

- 666 34. Jimenez, A., Carrasco, L. & Vazquez, D. Enzymic and nonenzymic translocation by yeast  
667 polysomes. Site of action of a number of inhibitors. *Biochemistry* **16**, 4727-4730 (1977).
- 668 35. McKeehan, W. & Hardesty, B. The mechanism of cycloheximide inhibition of protein  
669 synthesis in rabbit reticulocytes. *Biochemical and Biophysical Research Communications*  
670 **36**, 625-630 (1969).
- 671 36. Nadanaciva, S. et al. A high content screening assay for identifying lysosomotropic  
672 compounds. *Toxicol In Vitro* **25**, 715-723 (2011).
- 673 37. Petersen, Nikolaj H.T. et al.
- 674 38. Ellegaard, A.-M. et al.
- 675 39. Roy, M., Dumaine, R. & Brown, A.M. HERG, a primary human ventricular target of the  
676 non-sedating antihistamine terfenadine. *Circulation* **94**, 817-823 (1996).
- 677 40. Zhou, Z., Vorperian, V.R., Gong, Q., Zhang, S. & January, C.T. Block of HERG Potassium  
678 Channels by the Antihistamine Astemizole and its Metabolites Desmethylastemizole and  
679 Norastemizole. *Journal of Cardiovascular Electrophysiology* **10**, 836-843 (1999).
- 680 41. Morissette, G., Lodge, R. & Marceau, F. Intense pseudotransport of a cationic drug  
681 mediated by vacuolar ATPase: procainamide-induced autophagic cell vacuolization. *Toxicol*  
682 *Appl Pharmacol* **228**, 364-377 (2008).
- 683 42. Ashoor, R., Yafawi, R., Jessen, B. & Lu, S. The Contribution of Lysosomotropism to  
684 Autophagy Perturbation. *PLoS One* **8**, e82481 (2013).
- 685 43. Kazmi, F. et al. Lysosomal Sequestration (Trapping) of Lipophilic Amine (Cationic  
686 Amphiphilic) Drugs in Immortalized Human Hepatocytes (Fa2N-4 Cells). *Drug Metabolism*  
687 *and Disposition* **41**, 897-905 (2013).
- 688 44. Marceau, F. et al. Cation trapping by cellular acidic compartments: beyond the concept of  
689 lysosomotropic drugs. *Toxicol Appl Pharmacol* **259**, 1-12 (2012).
- 690 45. Muehlbacher, M., Tripal, P., Roas, F. & Kornhuber, J. Identification of Drugs Inducing  
691 Phospholipidosis by Novel in vitro Data. *Chemmedchem* **7**, 1925-1934 (2012).

- 692 46. Halliwell, W.H. Cationic amphiphilic drug-induced phospholipidosis. *Toxicol Pathol* **25**, 53-  
693 60 (1997).
- 694 47. Goracci, L., Ceccarelli, M., Bonelli, D. & Cruciani, G. Modeling Phospholipidosis Induction:  
695 Reliability and Warnings. *Journal of Chemical Information and Modeling* **53**, 1436-1446  
696 (2013).
- 697 48. Sun, H. et al. Are hERG channel blockers also phospholipidosis inducers? *Bioorganic &*  
698 *medicinal chemistry letters* **23**, 4587-4590 (2013).
- 699 49. Anderson, N. & Borlak, J. Drug-induced phospholipidosis. *FEBS Letters* **580**, 5533-5540  
700 (2006).
- 701 50. Lu, S., Sung, T., Lin, N., Abraham, R.T. & Jessen, B.A. Lysosomal adaptation: How cells  
702 respond to lysosomotropic compounds. *PLOS ONE* **12**, e0173771 (2017).
- 703 51. Napolitano, F., Sirci, F., Carrella, D. & di Bernardo, D. Drug-set enrichment analysis: a  
704 novel tool to investigate drug mode of action. *Bioinformatics* (2015).
- 705 52. Napolitano, G. & Ballabio, A. TFEB at a glance. *Journal of cell science* **129**, 2475-2481  
706 (2016).
- 707 53. Martina, J.A., Chen, Y., Gucek, M. & Puertollano, R. mTORC1 functions as a transcriptional  
708 regulator of autophagy by preventing nuclear transport of TFEB. *Autophagy* **8**, 903-914  
709 (2012).
- 710 54. Rocznik-Ferguson, A. et al. The transcription factor TFEB links mTORC1 signaling to  
711 transcriptional control of lysosome homeostasis. *Science signaling* **5**, ra42 (2012).
- 712 55. Settembre, C. et al. A lysosome-to-nucleus signalling mechanism senses and regulates the  
713 lysosome via mTOR and TFEB. *The EMBO journal* **31**, 1095-1108 (2012).
- 714 56. Sardiello, M. et al. A gene network regulating lysosomal biogenesis and function. *Science*  
715 **325**, 473-477 (2009).
- 716 57. Settembre, C. et al. TFEB links autophagy to lysosomal biogenesis. *Science* **332**, 1429-  
717 1433 (2011).

- 718 58. Medina, Diego L. et al. Transcriptional Activation of Lysosomal Exocytosis Promotes  
719 Cellular Clearance. *Developmental Cell* **21**, 421-430 (2011).
- 720 59. Medina, D.L. et al. Lysosomal calcium signalling regulates autophagy through calcineurin  
721 and TFEB. *Nature cell biology* **17**, 288-299 (2015).
- 722 60. Carrella, D. et al. Computational drugs repositioning identifies inhibitors of oncogenic  
723 PI3K/AKT/P70S6K-dependent pathways among FDA-approved compounds. *Oncotarget*  
724 (2016).
- 725 61. Jin, Y. et al. Antineoplastic mechanisms of niclosamide in acute myelogenous leukemia  
726 stem cells: inactivation of the NF-kappaB pathway and generation of reactive oxygen  
727 species. *Cancer Res* **70**, 2516-2527 (2010).
- 728 62. Ishii, I., Harada, Y. & Kasahara, T. Reprofilling a classical anthelmintic, pyrvinium pamoate,  
729 as an anti-cancer drug targeting mitochondrial respiration. *Frontiers in oncology* **2**, 137  
730 (2012).
- 731 63. Fonseca, B.D. et al. Structure-activity analysis of niclosamide reveals potential role for  
732 cytoplasmic pH in control of mammalian target of rapamycin complex 1 (mTORC1)  
733 signaling. *J Biol Chem* **287**, 17530-17545 (2012).
- 734 64. Newman, R.A., Yang, P., Pawlus, A.D. & Block, K.I. Cardiac glycosides as novel cancer  
735 therapeutic agents. *Molecular interventions* **8**, 36-49 (2008).
- 736 65. Wang, Y.C., Chen, S.L., Deng, N.Y. & Wang, Y. Network predicting drug's anatomical  
737 therapeutic chemical code. *Bioinformatics* **29**, 1317-1324 (2013).
- 738 66. Krishnan, A.V., Swami, S. & Feldman, D. Estradiol inhibits glucocorticoid receptor  
739 expression and induces glucocorticoid resistance in MCF-7 human breast cancer cells. *J*  
740 *Steroid Biochem Mol Biol* **77**, 29-37 (2001).
- 741 67. Zhang, Y., Leung, D.Y.M., Nordeen, S.K. & Goleva, E. Estrogen Inhibits Glucocorticoid  
742 Action via Protein Phosphatase 5 (PP5)-mediated Glucocorticoid Receptor  
743 Dephosphorylation. *The Journal of Biological Chemistry* **284**, 24542-24552 (2009).

- 744 68. Carollo, M., Parente, L. & D'Alessandro, N. Dexamethasone-induced cytotoxic activity and  
745 drug resistance effects in androgen-independent prostate tumor PC-3 cells are mediated by  
746 lipocortin 1. *Oncol Res* **10**, 245-254 (1998).
- 747 69. Zhang, C. et al. Corticosteroid-induced chemotherapy resistance in urological cancers.  
748 *Cancer Biol Ther* **5**, 59-64 (2006).
- 749 70. Hamid, N. & Krise, J.P. in *Lysosomes: Biology, Diseases, and Therapeutics* 423-444 (John  
750 Wiley & Sons, Inc., 2016).
- 751 71. Liu, J., Lee, J., Hernandez, M.A.S., Mazitschek, R. & Ozcan, U. Treatment of Obesity with  
752 Celastrol. *Cell* **161**, 999-1011 (2015).
- 753 72. Chen, B. & Butte, A.J. Leveraging big data to transform target selection and drug discovery.  
754 *Clinical pharmacology and therapeutics* **99**, 285-297 (2016).
- 755 73. Sirota, M. et al. Discovery and preclinical validation of drug indications using compendia of  
756 public gene expression data. *Science translational medicine* **3**, 96ra77 (2011).
- 757 74. JChem 14.9.15, 2014, ChemAxon (<http://www.chemaxon.com>)"
- 758 75. Milletti, F., Storchi, L., Sforza, G. & Cruciani, G. New and Original pKa Prediction Method  
759 Using Grid Molecular Interaction Fields. *Journal of Chemical Information and Modeling* **47**,  
760 2172-2181 (2007).
- 761 76. Molecular Operating Environment (MOE), 2013.08; Chemical Computing Group Inc., 1010  
762 Sherbooke St. West, Suite #910, Montreal, QC, Canada, H3A 2R7, 2016.
- 763 77. Cross, S., Baroni, M., Carosati, E., Benedetti, P. & Clementi, S. FLAP: GRID Molecular  
764 Interaction Fields in Virtual Screening. Validation using the DUD Data Set. *Journal of*  
765 *Chemical Information and Modeling* **50**, 1442-1450 (2010).
- 766 78. Cross, S. & Cruciani, G. Grid-derived structure-based 3D pharmacophores and their  
767 performance compared to docking. *Drug Discovery Today: Technologies* **7**, e213-e219  
768 (2010).
- 769 79. De Baets, B. & Mesiar, R. Metrics and T-Equalities. *Journal of Mathematical Analysis and*  
770 *Applications* **267**, 531-547 (2002).

771 80. Newman, M.E.J. Modularity and community structure in networks. *Proceedings of the*  
772 *National Academy of Sciences* **103**, 8577-8582 (2006).

773 81. WHO Collaborating Centre for Drug Statistics Methodology, ATC classification index with  
774 DDDs, 2014. Oslo 2014.

775

776            ***Acknowledgments***

777            The authors are grateful to the Bioinformatics Core (TIGEM). This work was supported by a  
778            Fondazione Telethon Grant (TGM11SB1) to DdB.

779            ***Competitive financial interests***

780            The authors declare no competing financial interests.

781            ***Materials and Correspondence***

782            Author: Diego di Bernardo

783            Email: [dibernardo@tigem.it](mailto:dibernardo@tigem.it)

784

785 **Table 1: Drug-pairs with different chemical structures but inducing very similar**  
 786 **transcriptional responses.** Drug-pairs in **Figure 2** (quadrant III) were ranked by transcriptional  
 787 distance (Tr. Dist.). Only the top 20 ranked drugs pairs are shown together with their structural  
 788 distance (Str. Dist.). Lysosomotropic drugs are shown in italic and phospholipidosis inducing drugs  
 789 in bold.  
 790

791

| Drug A               | Drug B                  | Tr. Dist. | Str. Dist. |
|----------------------|-------------------------|-----------|------------|
| digoxin              | lanatoside_C            | 0.131     | 0.693      |
| digoxin              | proscillaridin          | 0.166     | 0.758      |
| lanatoside_C         | proscillaridin          | 0.187     | 0.776      |
| rifabutin            | vorinostat              | 0.286     | 0.826      |
| <b>astemizole</b>    | <i>terfenadine</i>      | 0.337     | 0.724      |
| <b>astemizole</b>    | <i>mefloquine</i>       | 0.385     | 0.776      |
| doxorubicin          | mitoxantrone            | 0.414     | 0.651      |
| <i>mefloquine</i>    | <i>terfenadine</i>      | 0.421     | 0.767      |
| chlorzoxazone        | clindamycin             | 0.442     | 0.829      |
| chlorzoxazone        | glibenclamide           | 0.445     | 0.791      |
| <i>terfenadine</i>   | <b>trifluoperazine</b>  | 0.453     | 0.758      |
| irinotecan           | <i>phenoxybenzamine</i> | 0.455     | 0.800      |
| <b>suloctidil</b>    | <i>terfenadine</i>      | 0.466     | 0.696      |
| astemizole           | <b>trifluoperazine</b>  | 0.469     | 0.718      |
| <i>protriptyline</i> | <b>trifluoperazine</b>  | 0.472     | 0.713      |
| niclosamide          | <b>trifluoperazine</b>  | 0.472     | 0.688      |
| <i>mefloquine</i>    | <b>trifluoperazine</b>  | 0.478     | 0.674      |
| doxazosin            | sulconazole             | 0.481     | 0.776      |
| lomustine            | <i>phenoxybenzamine</i> | 0.484     | 0.719      |



792 **Figures legend**

793

794 **Figure 1: The structural network among 5452 compounds.** The network is partitioned into  
795 *communities* (groups of highly interconnected nodes) and *rich-clubs* (groups of communities)  
796 sharing common chemical structures and enriched for drugs with similar Mode of Action. Examples  
797 of three Rich Clubs are shown: **a)** The steroids rich-club (1: testosterone scaffold, 2: estradiol  
798 scaffold, 3: cortisone scaffold, 4: progesterone scaffold, 5 and 6: mixed steroids); **b)** The antibiotics  
799 rich-club (1 and 2: tetracycline scaffold, 3: cephalosporin scaffold, 4: penicillin scaffold); **c)** The  
800 CNS-acting drug rich-club (1 and 2: phenothiazine scaffold, 3-6: various tricyclic antidepressant  
801 scaffolds).  
802

803 **Figure 2: Comparison of transcriptional and structural distances between 784 CMAP**  
804 **compounds having at least one ATC annotation.** Each dot represents the structural (x-axis) and  
805 transcriptional (y-axis) distance between two compounds. A total of 306,936 drug-pairs are shown.  
806 Drug-pairs having the same clinical application as annotated by their ATC code are represented by  
807 red dots. Dashed lines represent the significance threshold for the transcriptional (horizontal line)  
808 and structural (vertical line) distance, splitting the plane into four quadrants. Representative  
809 examples of drug-pairs are shown for quadrants I, II and III: drug-pairs in quadrant I have similar  
810 structure but induce different transcriptional responses; drug-pairs in quadrant II exhibit both similar  
811 structure and similar transcriptional responses; drug-pairs in quadrant III have different structures  
812 but induce similar transcriptional responses.

813

814 **Figure 3: The Transcriptional Variability (TV) of different drug classes.** Box-plots summarising  
815 the TV for drugs within each class. The bold line in each box represents the median, while the  
816 whiskers represent the 25<sup>th</sup> and the 75<sup>th</sup> percentile. Dots represent outliers. Prt.inh.: Protein  
817 synthesis inhibitors; HDAC: histone deacetylase inhibitors; Chemoth.: chemotherapeutic agents;  
818 Antibio.: antibiotics; NSAIDs: non-steroid antiinflammatory agents; GC: glucocorticoids; Antipsych:  
819 antipsychotics; Antihist: antihistamines.

820

821 **Figure 4: Performance of the transcriptional distance in detecting drugs with the same ATC**  
822 **code.** Compounds were divided into three sets: (All) the 1165 compounds in CMAP having at TV  
823 value; (High TV) 582 compounds with a TV higher than the median TV among all the compounds;  
824 (Low TV) 582 compounds with a TV lower than the median TV. For each set, the transcriptional  
825 distance of each drug-pair was computed. Drug-pairs were then sorted according to their  
826 transcriptional distance, with drug-pairs with the smallest distance towards the origin of the *x-axis*;  
827 the Positive Predictive Value (PPV) was computed as the percentage of True Positives over False  
828 Positives plus True Positives and shown on the *y-axis*. The PPV obtained by randomly sorting  
829 drugs is also shown (Random).

830 **Figure 5: Drugs inducing a lysosomotropic gene expression signature.** The transcriptional  
831 responses elicited by 8 lysosomotropic compounds were combined into a single node in the  
832 transcriptional drug network (red triangle). Transcriptional distances to this lysosomotropic gene  
833 expression signature were computed for all the 1309 drugs in CMAP. Only drugs with a

834 transcriptional distance below the significance threshold are shown (0.8) and colour-coded  
835 according to their ATC classification.

836

837 **Figure 6: Effects of drugs on TFEB nuclear translocation and LipidTOX assay.** A) TFEB  
838 localization in stably HeLa cells overexpressing TFEB-GFP and treated with DMSO or the  
839 indicated drugs. B) Lipid accumulation in HeLa cells was detected by staining with LipidTOX  
840 reagent upon drug treatment.

841

**A**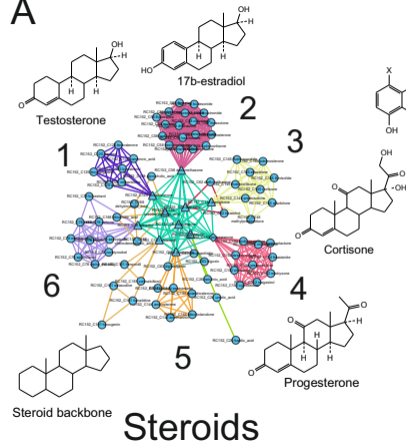**B**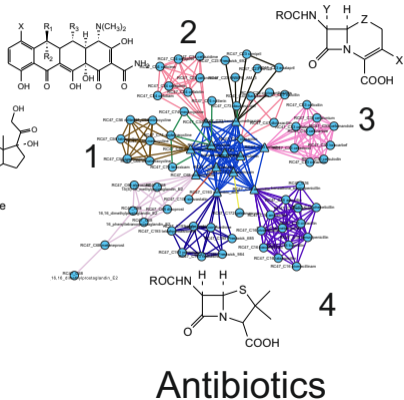**C**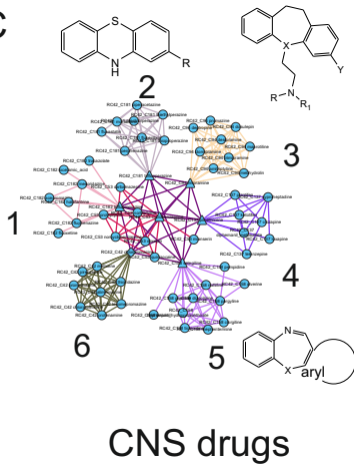

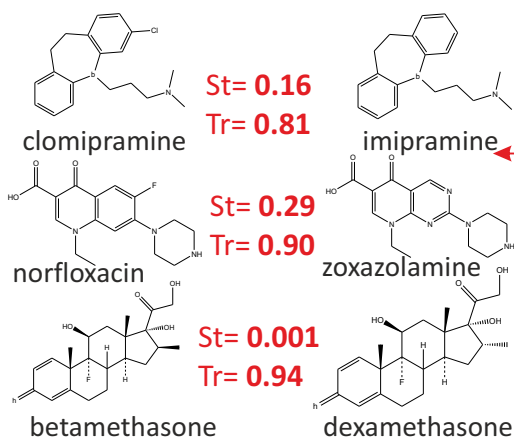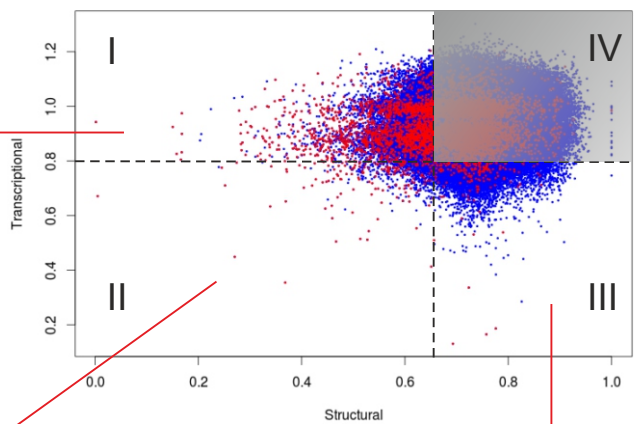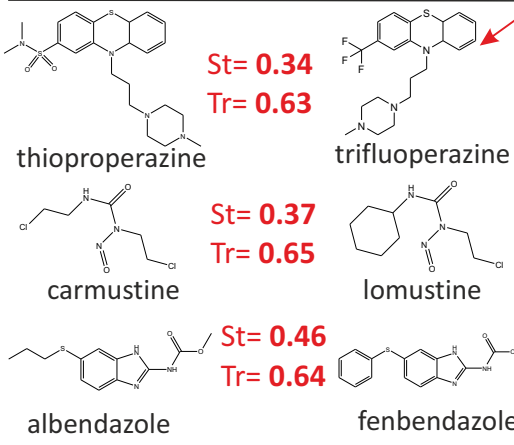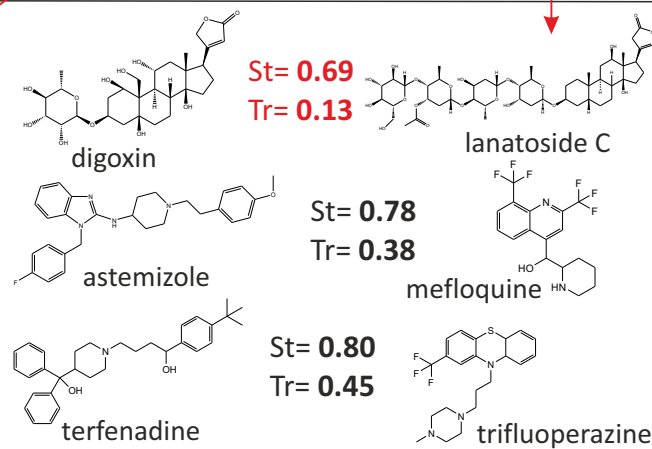

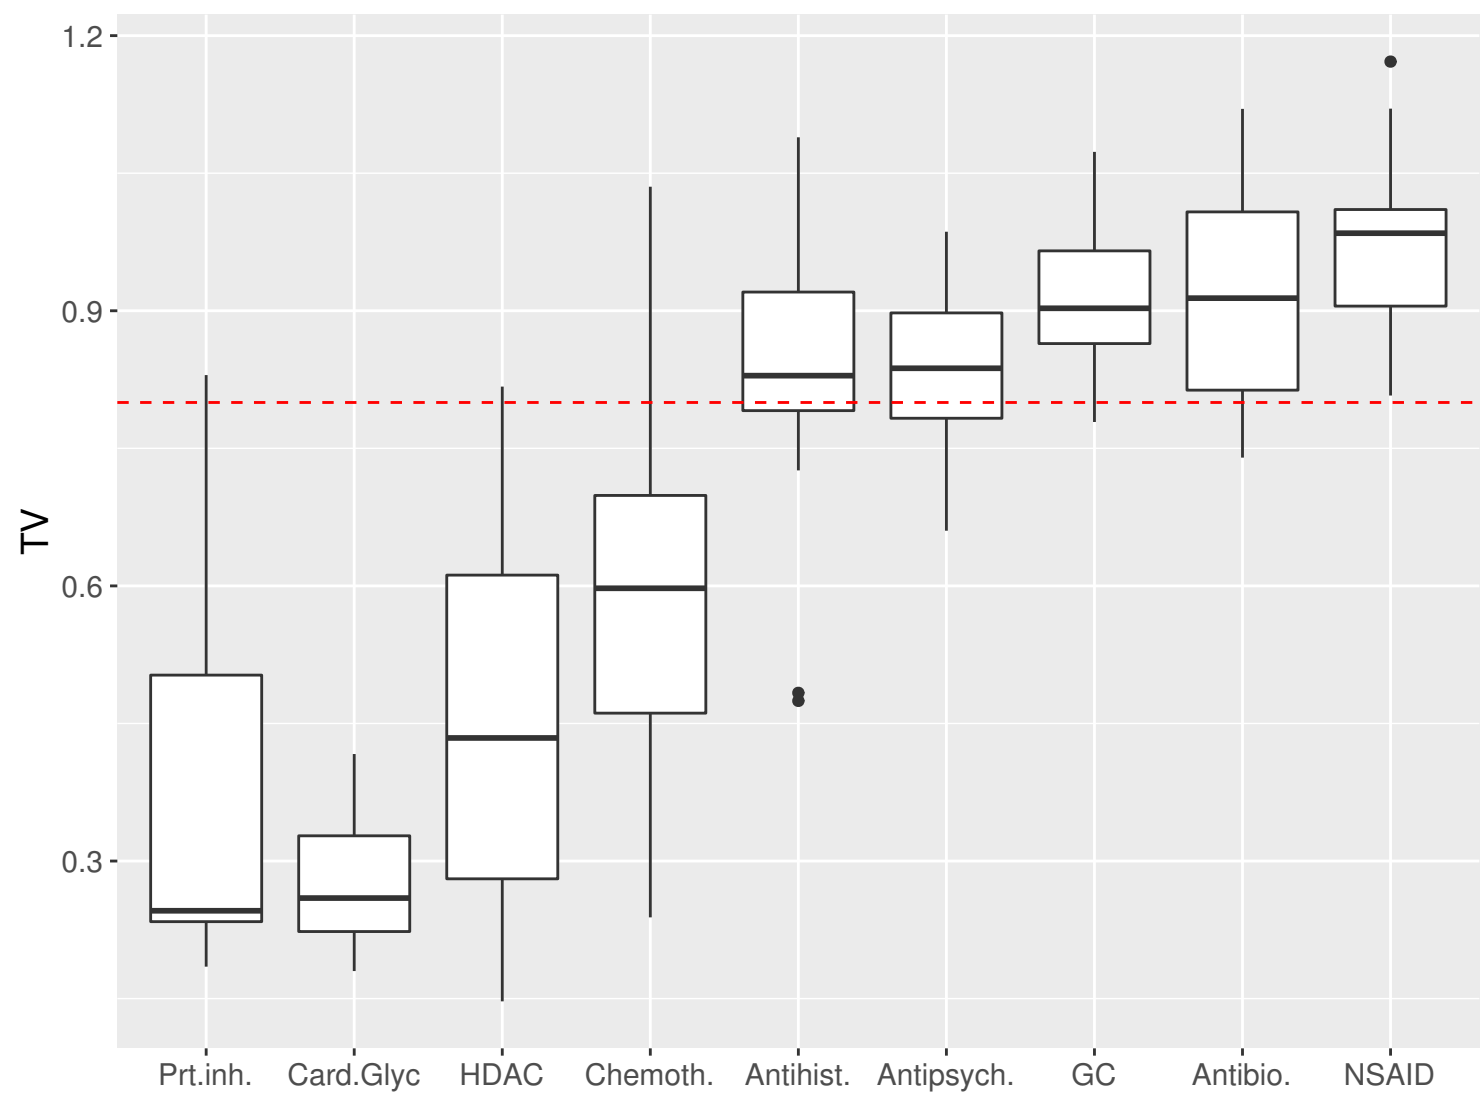

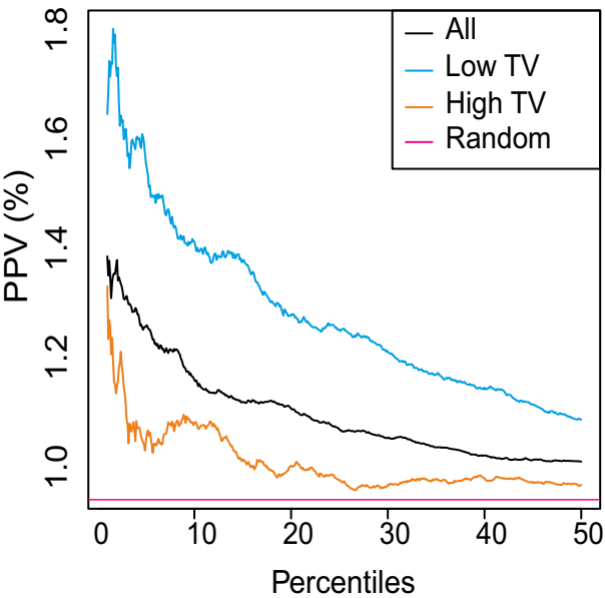

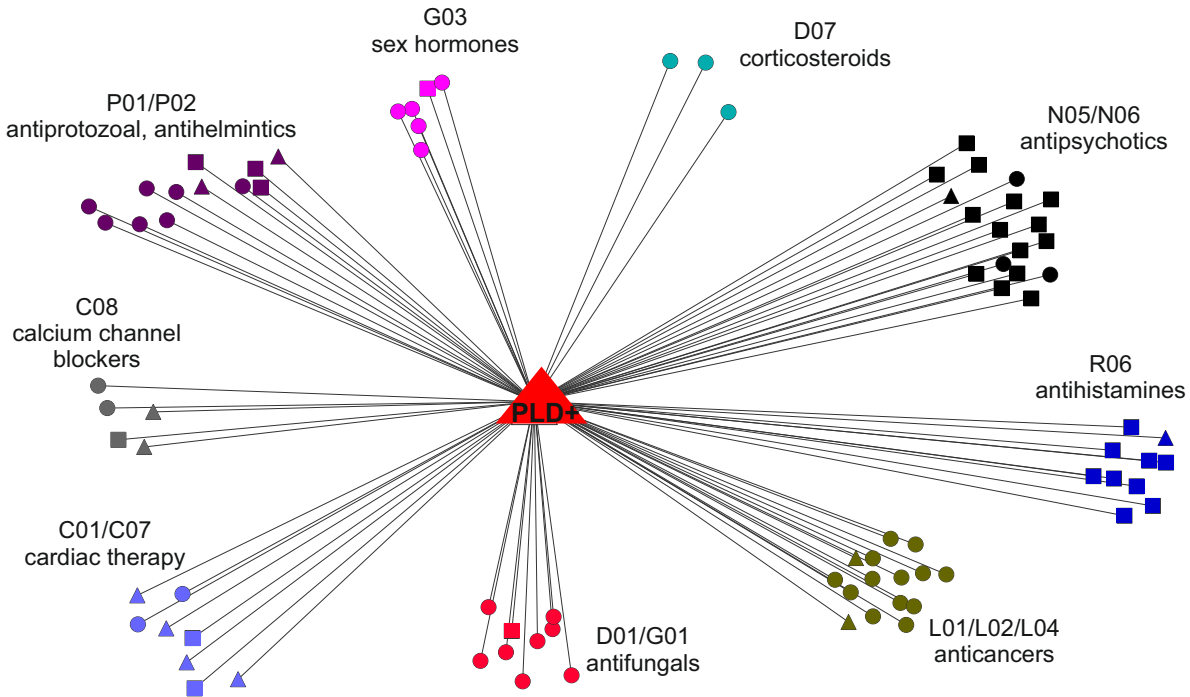

**A****DMSO****CHLOROQUINE****ASTEMIZOLE****TERFENADINE****TFEB NT**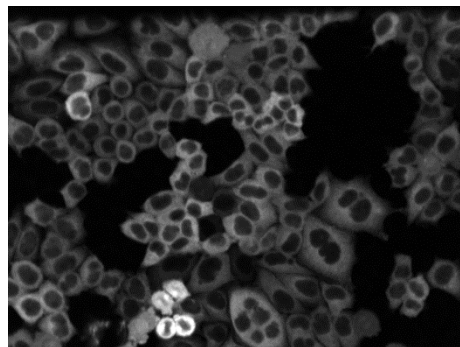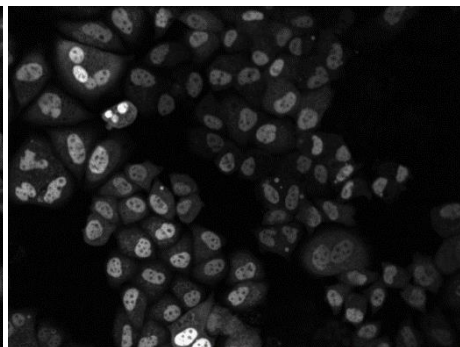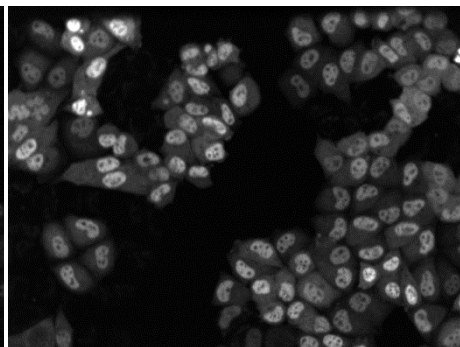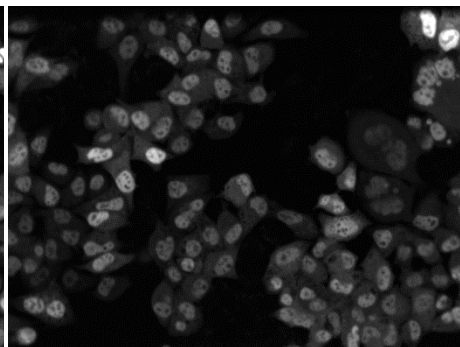**B****LipidTOX**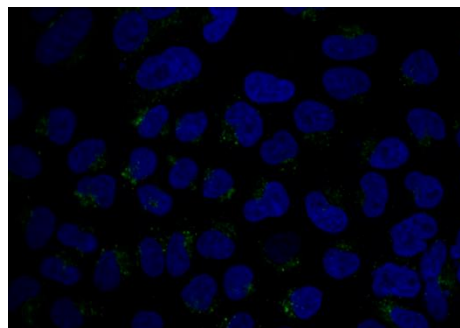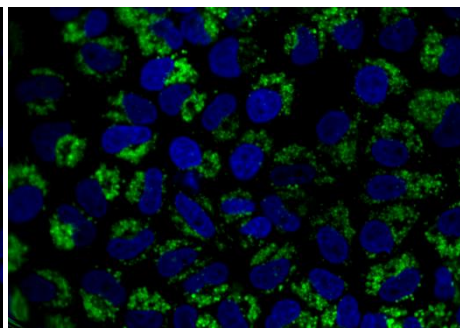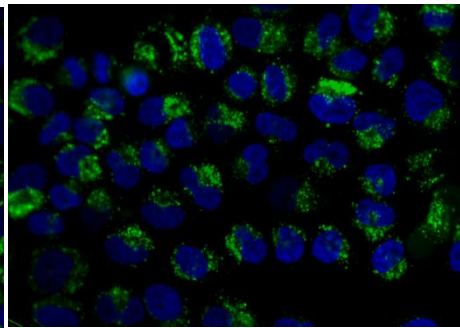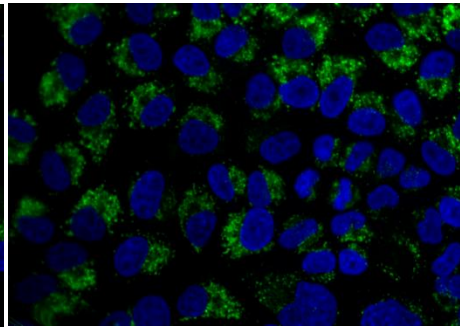

Source: https://www.biorxiv.org/content/10.1101/119990v1.full.pdf
